# Supplementary material for: Transcriptomic evidence of a para-inflammatory state in the middle aged lumbar spinal cord
Source: PubMed Central journal article supplement (PMC5390443; doi:10.1186/s12979-017-0091-6), 2017-04-13
Supplement: 12979_2017_91_MOESM1_ESM.pdf [file 12979_2017_91_MOESM1_ESM.pdf]

**SUPPLEMENTARY TABLE 3: Primer sequences used in the qPCR measurements**

| <b>Gene</b> | <b>Forward</b>              | <b>Reverse</b>                |
|-------------|-----------------------------|-------------------------------|
| Lgals       | 5'-CCCCGACTGGACCACTGA-3'    | 5'-GAGTGATACTGTTTGC GTTGGG-3' |
| Fcgr2b      | 5'-ACGCTAAATGTCACAGAGCCC-3' | 5'-CGCGTCCTTCACAGTGGT-3'      |
| Gpnmf       | 5'-TGCAAAGGGGCCACTCC-3'     | 5'-GGACAGGAGGCACAGCTC-3'      |
| C3          | 5'-GCGGTACTACCAGACCATCG-3'  | 5'-GCCGATCTTCAAGGGGACAA-3'    |
| Atf3        | 5'-TACTGCGTTGTCCCACTCTG-3'  | 5'-GGCCAGCTAGGTTCATCTGAG-3'   |
| Ptprc       | 5'-CCACGGGTATTCAGCAAGTT-3'  | 5'-AGAGAGCTCCACACGGTTGT-3'    |
| Cd163       | 5'-AGCCATCGGAATCATCAGAC-3'  | 5'-GCTCACAGCCACAACAAAGA-3'    |
| Nrg1        | 5'-GGGACCAGCCATCTCATAAA-3'  | 5'-ATCTTGACGGGTTTGACAGG-3'    |
| Cd11b       | 5'-CCAGTGTGACATCCCTTCCT-3'  | 5'-AGTGCTCACAAGCAGGAGGT-3'    |
| Gapdh       | 5'-CAGGGCTGCCTTCTTGTG-3'    | 5'-AACTTGCCGTGGGTAGAGTC-3'    |
